**1 Linking the development and functioning of a carnivorous pitcher plant’s microbial**  
**2 digestive community**

3

4 *Running title:* Pitcher plant microbial succession and functioning

5

6 *Author:* David W. Armitage <sup>a, b</sup>

7 <sup>a</sup>Department of Integrative Biology, University of California Berkeley, 3040 Valley Life  
 8 Sciences Building, Berkeley, CA, USA 94720-3140

9 <sup>b</sup>Department of Biological Sciences, University of Notre Dame, 100 Galvin Life Science  
 10 Center, Notre Dame, IN, USA 46556

11

12 *Correspondence:*

13 Department of Biological Sciences, University of Notre Dame, 100 Galvin Life Science  
 14 Center, Notre Dame, IN, USA 46556

15 *E-mail:* [dave.armitage@gmail.com](mailto:dave.armitage@gmail.com)

16 *Tel:* +1.248.736.4174

17

18 *Statement of authorship:* DWA conceived this work, performed data collection and analysis,  
 19 and wrote the manuscript.

20 *Conflict of interest statement:* The author declares no conflicts of interest.

21 *Data accessibility statement:* Data are publically available on the MG-RAST server under  
 22 project ID mgp14344

23 *Funding statement:* Funding was provided by NSF DEB-1406524 & an NSF GRFP

24 *Subject category:* Microbe-microbe and microbe-host interactions

25

## ABSTRACT

Ecosystem development theory predicts that successional turnover in community composition can influence ecosystem functioning. However, tests of this theory in natural systems are made difficult by a lack of replicable and tractable model systems. Using the microbial digestive associates of a carnivorous pitcher plant, I tested hypotheses linking host age-driven microbial community development to host functioning. Monitoring the yearlong development of independent microbial digestive communities in two pitcher plant populations revealed a number of trends in community succession matching theoretical predictions. These included mid-successional peaks in bacterial diversity and metabolic substrate use, predictable and parallel successional trajectories among microbial communities, and convergence giving way to divergence in community composition and carbon substrate use. Bacterial composition, biomass, and diversity positively influenced the rate of prey decomposition, which was in turn positively associated with a host leaf's nitrogen uptake efficiency. Overall digestive performance was greatest during late summer. These results highlight links between community succession and ecosystem functioning and extend succession theory to host-associated microbial communities.

## INTRODUCTION

Although the capacity for community composition to mediate ecosystem processes is widely recognized (Hooper *et al.*, 2005), few theoretical (Finn, 1982; DeAngelis, 1992; Loreau, 1998) and empirical studies (Fisher *et al.*, 1982; Schmidt *et al.*, 2007) have investigated community-ecosystem linkages along natural successional gradients. Ecosystem development theory (Odum, 1969) seeks to explain temporal variation in ecosystem properties in terms of community successional turnover. Central to this theory is the prediction that successional turnover can influence elemental cycling rates leading to a coupling of community composition and ecosystem processes through time (Odum, 1969; Huston and Smith, 1987; DeAngelis, 1992; Loreau, 1998). It is worth noting that modern succession theory does not assume directionality toward a stable equilibrium (or ‘climax’), but instead recognizes that the temporal trajectories of ecosystems can vary due to the relative influences of general ecological processes (Meiners *et al.*, 2015). Although these predictions have not been immune to critique on both theoretical and empirical grounds, adequately replicated tests in natural communities remain scarce.

The natural microcosms of host-associated microbial communities offer a number of unique advantages for testing ecosystem development hypotheses. First, microbiota can enable identifiable and measureable functions for their hosts (Bäckhed *et al.*, 2005; Lugtenberg and Kamilova, 2009). Next, the habitats being colonized are often nearly identical among closely-related individuals, permitting repeated, independent observations of ecosystem development. Finally, the successional dynamics of host-associated microbiota frequently operate over time scales proportional to the host’s lifespan, which can manifest as large shifts in community composition and function over relatively short time periods.

This study uses the microbial digestive communities in developing leaves of the pitcher plant *Darlingtonia californica* (Sarraceniaceae) (Figure 1a) to test the following

hypotheses linking community succession to ecosystem function (Figures 1b-e): First, alpha diversity will either asymptotically increase or be unimodal over the host leaf's lifespan as taxa are recruited from the regional pool and subsequently persist or are excluded by superior competitors (Odum, 1969; Loucks, 1970; Auclair and Goff, 1971; Connell and Slatyer, 1977; Fierer *et al.*, 2010). Consequently, trait diversity (e.g., biochemical pathways, C-substrate use) is also expected to increase as succession proceeds (Odum, 1969). Second, rates of biomass production should decrease over time, as growth-limiting nutrients are lost from the system and/or stored in living biomass — this should manifest as a logistic-like biomass-curve (Odum, 1969; Vitousek and Reiners, 1975; Fierer *et al.*, 2010). Third, beta diversity will increase over time if environmental differences among pitchers cause spatially-variable selection or drift, or decrease over time if different leaves constitute similar selective environments (Christensen and Peet, 1984; Dini-Andreote *et al.*, 2015). Fourth, host ecosystem properties (e.g., nutrient cycling, decomposition) should increase monotonically or be unimodal, concomitant with changes in alpha diversity and biomass, as the accumulation of individuals of different species accelerates the degradation of organic material (Cardinale *et al.*, 2007; Weis *et al.*, 2007; Armitage, 2016). This leads to the prediction that biodiversity and biomass dynamics will set ecosystem processes rates (e.g., decomposition), which, in turn, will set rates on host functioning (e.g., nutrient uptake rates) (Hooper *et al.*, 2005).

To test these hypotheses, I followed cohorts of pitcher leaves over three years and quantified their associated digestive communities through time. In addition, I measured these communities' rates of decomposition, respiration, and their host leaves' nitrogen uptake efficiencies. These data were used to test whether host-associated digestive communities follow general, predictable successional patterns and whether their turnover can influence a host's ability to digest prey and sequester nutrients.

101

## 102 MATERIALS AND METHODS

103 Complete documentation of the study system, data collection, and statistical analyses are  
104 provided in the supplementary materials and methods.

105

### 106 *In situ* isotopic labeling of pitcher leaves

107 A stable isotope pulse-chase experiment was used to measure rates of decomposition  
108 and nitrogen cycling by the pitchers' aquatic food webs. In early June 2013, I identified and  
109 tagged 50 unopened *Darlingtonia* pitcher leaves of equivalent age on different plants  
110 growing in a large population in the Plumas National Forest (Plumas Co., CA). Pitcher leaves  
111 remain sterile until completing their development and commencing prey capture, and each  
112 leaf has a lifespan of approximately 1.5 years. On the day the pitcher leaves first opened in  
113 mid-June, I fed gel capsules containing 20 sterile, <sup>15</sup>N-enriched fruit flies (*Drosophila*  
114 *melanogaster*) to five random leaves, which were then left undisturbed for 11 days. I returned  
115 to the site to remove these <sup>15</sup>N-labeled pitcher leaves and to feed isotope-labeled flies to 5  
116 additional leaves belonging to the same cohort. This process was repeated every 11 days up  
117 to day 88 (mid-September), and again on day 365 (June 2014) with 10 leaves. Because the  
118 weight of enriched flies (4.25 mg) was much smaller than the average (177 mg) and standard  
119 deviations (176 mg) of natural prey masses within a leaf age class, this prey addition was  
120 unlikely to significantly overwhelm the natural variation in nutrient levels experienced by  
121 pitcher food webs. The 11-day timeframe was chosen based on preliminary data  
122 demonstrating peak N incorporation rates by lab-reared plants between 4 and 11 days after  
123 prey capture. I repeated this experiment in 2014-2015 in a nearby population of *D.*  
124 *californica* and included an additional 166-day sample. The sampled leaves were placed on  
125 ice and quickly returned to the lab.

126

## 127 **Quantification of pitcher leaf communities through time**

128 From each freshly-collected leaf I removed 700 microlitres (μL) of fluid for DNA  
 129 extraction using the PowerSoil microbial DNA isolation kit (MoBio Laboratories, Inc.) and  
 130 stored the extractions at -80° C. Next, I dissected the pitcher leaves and categorized the state  
 131 of fruit fly decomposition on an ordinal scale from 0 (no decomposition; flies undamaged) to  
 132 5 (completely decomposed; head capsules and wings only). I identified and enumerated all  
 133 protists and living arthropods (primarily *Sarraceniopus* mites and *Metriocnemus* midge  
 134 larvae) in each leaf's fluid and interior surface under a light microscope and used  
 135 epifluorescence microscopy to enumerate SYBR-Gold (Thermo Fisher Scientific, Inc.)  
 136 stained bacterial cells and virus-like-particles bound to 0.02 micrometer (μm) filters. All prey  
 137 detritus in a leaf was oven-dried at 60° C and weighed.

138

## 139 *Bacterial community sequencing*

140 Extracted DNA was sent for PCR amplification of the 16S SSU-rRNA genes (primer  
 141 set 515f/806r) and multiplexed 2×150 bp paired-end sequencing on the Illumina MiSeq at the  
 142 Argonne National Lab Core Sequencing Facility (Lemont, IL). Sequences were deposited on  
 143 the MG-RAST public server (<http://metagenomics.anl.gov/>) server under project ID  
 144 mgp14344. The QIIME bioinformatics pipeline was used to assemble and cluster reads into  
 145 97% operational taxonomic units (OTUs) (Caporaso *et al.*, 2010). I calculated each  
 146 community's alpha diversity (Shannon's H, richness, phylogenetic) and beta diversity  
 147 (Jensen-Shannon distance and weighted/unweighted UniFrac — a measure of community  
 148 phylogenetic dissimilarity) using the *vegan* and *PhyloSeq* R packages, and used library size  
 149 factor (LSF) normalization for all beta diversity metrics (McMurdie and Holmes, 2013; R  
 150 Development Core Team, 2015; Oksanen *et al.*, 2015; Love *et al.*, 2014). Beta diversities for

each sampling period were estimated using average inter-sample distances, and the results were unchanged when distances-to-centroid were used. I tested whether community composition changed with pitcher age using permutational analysis of variance (Anderson, 2001) on samples' Jensen-Shannon distances (JSD) and UniFrac distances and visualized these results using PCoA plots. Results were unchanged when rarefaction was used for normalization.

To assess the generality of successional turnover in pitcher communities, I modeled OTU counts using a negative binomial generalized linear model (GLM) (Love *et al.*, 2014). Models were fit using empirical Bayes and OTUs experiencing significant log<sub>2</sub>-fold change among time points were identified using Wald *p*-values. I defined the 'successional microbiome' as the subset of OTUs experiencing a statistically significant ( $\alpha = 0.01$ )  $\geq 8$ -fold change in abundance between any two pitcher age classes and used these OTUs to construct an abundance-weighted heat map. The predictive accuracy of this subset of OTUs was assessed by training a random forest machine learning algorithm on OTU counts from the 2013 study population and using it to predict the age of samples from the independent 2014 study population. Model accuracy was evaluated using the coefficient of determination ( $R^2$ ) for predicted vs. observed ages along a 1:1 line. The entire bioinformatic/analytical pipeline is illustrated in figure S1.

### *Estimating microbial community traits*

The Biolog GN2 microplate assay (Biolog Inc., Hayward, CA) was used to measure the carbon substrate use patterns of the microbial communities from an independent collection of 11, 55, and 365 day-old pitchers (10 from each age in 2014). These time-points were chosen to represent early, middle, and late-stage communities. Plates were inoculated in triplicate using the same dilute, filtered, starved communities described above, and incubated

for 3 days at 25° C. I regressed substrate counts against leaf age using a negative binomial GLM to determine whether the number of metabolized substrates differed among leaf community age. To visualize differences in substrate profiles between age classes, I plotted samples onto principal coordinate (PCoA) axes based on their Jaccard distances.

I used ancestral genome reconstruction implemented by the PICRUSt software (Langille *et al.*, 2013) to predict the rRNA copy number and functional gene contents for the subset of OTUs in my samples present in the greengenes database (nearest sequenced taxon index =  $0.071 \pm 0.01$  SEM). I estimated the mean weighted rRNA copy number of each pitcher sample (Nemergut *et al.*, 2015) and then evaluated their temporal turnover using ANOVA. Pitcher samples were then ordinated based on their predicted level 3 KEGG pathway relative abundances (Kanehisa *et al.*, 2016) using principal components analysis (PCA) and then hierarchically clustered. I filtered KEGG pathways using ANOVA *p*-values ( $p \leq 0.01$ ) and effect sizes ( $\eta^2 \geq 0.26$ ) in order to identify genes and pathways (focusing primarily on enzymes involved in protein degradation and nitrogen transformation) that were predicted to be differentially enriched across time points. The predictive nature of these data precluded statistical hypothesis testing, and are treated as speculative hypotheses.

### **Quantification of pitcher ecosystem properties through time**

Empty pitcher leaves were thoroughly rinsed, dried at 60° C, homogenized in a bead-beater, weighed, and analyzed for  $^{15}\text{N}$  using an isotope ratio mass spectrometer at the UC Davis Stable Isotope Facility (Davis, CA). I used the fly and leaf  $^{15}\text{N}$  measurements to estimate the total amount of fly-derived  $^{15}\text{N}$  found in a leaf's tissue after 11 days, which is interpreted to be the host leaf's nitrogen uptake efficiency.

To estimate each pitcher microbial community's potential C-respiration rate, I inoculated starved, washed pellets of pitcher bacteria into deep-well plates containing 800  $\mu\text{L}$



sterile medium comprised of M9 salt solution and ground cricket powder. I used the MicroResp<sup>TM</sup> respirometry system to measure the rates of CO<sub>2</sub>-C respired from cultures over three days at 25° C. These rates of CO<sub>2</sub> respiration reflect the potential respiration rates of each pitcher's bacterial community in a common environment.

I assessed temporal variation in pitcher ecosystem properties using ANOVA for N uptake efficiency/carbon respiration and a multinomial logit model for the fly decomposition category (Agresti, 2013). Covariates in these models included bacterial biomass and diversity, midge larvae abundance, leaf dry weight, and leaf age. Best-fit models were identified pluralistically using a combination of R<sup>2</sup> and small-sample adjusted Akaike Information Criterion (AIC<sub>c</sub>) statistics (Burnham and Anderson, 2003). To investigate whether bacterial community composition influenced host functioning, I ran a Mantel test to assess whether pairwise Euclidean distances among samples' N uptake efficiencies covaried with their pairwise JSD or UniFrac dissimilarity metrics.

### **Verifying the effects of community structure on host function**

Pitcher leaves of differing ages might physiologically regulate nitrogen uptake independent of their associated food webs, which can obscure food web effects. To account for this, I ran a field experiment to separate the effects of the food web and host leaf age on rates of N uptake. During late July 2014 I identified 15 pitcher leaves aged 11 days, 55 days, and > 365 days (5 leaves of each age), intended to represent young, middle-aged, and senescing pitchers based on developmental trends observed the previous year. The fluid from these leaves was removed and mixed in equal parts to form a homogenate. 5 mL aliquots of these homogenized communities were then returned to the host plants. Additionally, 20 <sup>15</sup>N-enriched fruit flies were delivered into each leaf. I returned after 11 days to harvest and process these pitchers for N-uptake efficiency as previously described. I used ANOVA to test

whether the N-uptake efficiencies of these pitchers with homogenized food webs recapitulated the N-uptake patterns from natural pitcher food webs of equivalent age from the same population.

## RESULTS

### Temporal changes in the *Darlingtonia* food web

The dynamics of dead and living biomass were qualitatively similar to the predictions in figure 1a. Pitcher leaves' prey biomass varied widely among leaves of the same age, and mean prey masses quickly increased after opening and remained relatively stable throughout the plant's lifespan (Figure 2a). Bacterial biomass also rapidly accumulated in young pitcher leaves and increased over time during the first growing season to a maximum of  $1 \times 10^{11}$  cells  $\text{mL}^{-1}$  before declining during the second growing season (Figure 2a). Virus-like particles, *Sarraceniopus darlingtonae* mites, and *Polytomella agilis* flagellates also increased in abundance during the first growing season (Figs. 2a, S1). In addition to *P. agilis*, I detected numerous other eukaryotes, including *Bodo*, *Monas*, *Petalomonas*, *Rhynchobodo*, *Chilomonas*, *Colpoda*, *Philodina*, and *Chlamydomonas*, but these taxa were observed in 10 or fewer pitcher leaves with no apparent temporal trends in occupancy or richness (Figure S2). Likewise, I did not detect a temporal trend in bacterivore beta diversity among time points until they diverged in year 2 (Figure S2).

### Composition and convergence of pitcher bacterial communities

After quality filtering of 16S amplicon sequences, the final OTU table consisted of 3 642 446 total reads representing 762 97% OTUs. The minimum and maximum number of reads per sample ( $n = 99$ ) were 21 983 and 83 157, respectively (mean = 36 972), and read counts did not differ among age classes ( $F_{9,89} = 1.3$ ,  $p = 0.26$ ). Of the top 50 most abundant OTUs

detected across pitcher samples, the majority belonged to families Bacteroidetes (Figure S3), Firmicutes (Figure S4), and Proteobacteria (Figure S5). As hypothesized in figure 1a, bacterial alpha diversities (Shannon's  $H'$ ) peaked at the end of the first growing season and experienced a slight decrease after day 88 (Figure 2b), whereas phylogenetic diversity increased over the entire study period (Figure S2). Taxonomic richness was highly correlated with phylogenetic diversity (Pearson's  $r = 0.96$ ) — increasing over time with the greatest variation among the 365-day samples. In contrast with the prediction in figure 1c, however, community composition tended to converge (i.e., beta diversity decreased) during the course of the first growing season, and diverge again during the start of the second growing season, according to both taxonomic (Figure 2c) and phylogenetic (Figure S2) dissimilarity metrics. Furthermore, permutational ANOVA on Jensen-Shannon and UniFrac distances revealed a structuring of pitcher bacterial communities by age class (table S1) and parallel successional trajectories between years (Figs. 3a, S6).

A subset of OTUs experienced particularly strong temporal turnover (Figure 4). These taxa fell primarily into the phyla Proteobacteria (37 OTUs), Bacteroidetes (16 OTUs) and Firmicutes (14 OTUs). Using these OTUs to train a random forest classifier to predict the pitcher community's age resulted in a high classification accuracy for withheld data (observed vs. predicted  $R^2 = 0.80$ ). Likewise, a random forest trained on 2013 data was successful at predicting the ages of samples collected from the independent 2014 population ( $R^2 = 0.75$ ) (Figure S8), implying that observed community trajectories are parallel and generalizable between individuals and populations.

### **Temporal trends in the functional attributes of pitcher microbiota**

Assays of pitcher communities' carbon substrate use patterns mirrored trends in taxonomic and phylogenetic alpha and beta-diversities — namely, early and late-stage pitcher

communities both metabolized significantly fewer carbon substrates than did 55-day communities (Figure 5a). Furthermore, 11-day and 365-day pitchers' substrate profiles were much more variable than and clustered apart from the 55-day samples. (Figs. 3b, 5b).

A PCA plot of samples' reconstructed metagenomes predicted pitcher samples to separate by age, with the greatest distances between the 11-day and 365-day communities (Figure S8). The average number of rRNA gene copies per taxon was predicted to be greater in 11-day pitchers than in any other age class (Figure S9). This trend was also observed in the relative abundances of a number of other predicted KEGG pathways, such as flagellar assembly, motility, chemotaxis, and ABC transporters (Figure S10). Conversely, a variety of metabolic pathways were predicted to increase over time (Figure S11). Likewise, the abundances of genes involved in nitrogen cycling (deamination, nitrogen mineralization, denitrification, and nitrogen fixation) were also predicted to increase over a pitcher leaf's lifespan (Figs. S12-S15).

### **Linking community dynamics and ecosystem properties**

Prey decomposition was unimodal over leaves' lifespans, peaking at 44-88 days (Figure 6a). This increased decomposition, however, did not herald similar temporal differences in common-garden community respiration rates, although there was still a positive, non-significant unimodal trend in mean respiration rates over time (Figure S2). Multinomial logit models predicted bacterial diversity, bacterial abundance, and midge abundance to positively influence a pitcher's probability of having a higher decomposition score (Figures 6b and 6c, Table 1). Leaf nitrogen uptake efficiency also increased during the first growing season and subsequently declined at the start of year 2 (Figure 6d), and was found to be positively associated with decomposition extent and leaf dry mass (Figure 6e, Table 1). Additionally, there was a weak but significant positive correlation between pitcher samples'

JSD/unweighted UniFrac distances and their Euclidean distances in nitrogen uptake efficiencies (JSD Mantel  $r = 0.08$ ,  $p < 0.05$ ; UniFrac Mantel  $r = 0.10$ ,  $p < 0.05$ ). Finally, in contrast to natural pitcher samples collected in 2014, the nitrogen uptake efficiencies of experimentally-homogenized pitcher food webs did not differ between leaf age classes ( $F_{2,12} = 0.98$ ,  $p = 0.40$ ) (Figure 7).

## DISCUSSION

As predicted, community diversity and biomass were positively associated with rates of prey decomposition, and the extent of decomposition was positively associated with the fraction of prey-derived nitrogen removed from the food web by the host leaf. In concert, these results imply that the services these digestive communities provide their hosts are time-dependent — highlighting important, general linkages between the temporal dynamics of communities and rates of ecosystem or host function.

### Temporal patterns in community composition

The logistic-like accumulation of both bacterial diversity and biomass in developing pitcher leaves aligns with both predictions from succession models (Figure 1b) and time series of animal gut communities (e.g., Koenig *et al.*, 2011; Jemielita *et al.*, 2014). However, it is important to note that both bacterial and midge abundances decreased over the winter — likely in response to the cessation of prey capture. A unimodal or monotonic increase in diversity over time is anticipated for open systems experiencing high rates of immigration and low rates of extinction, which is the likely state of pitcher leaves during their first growing season. Once leaves cease to produce prey attractants, prey capture becomes more stochastic (Wolfe, 1981). Because of this, bacterial communities may experience extinctions under diminishing resource levels or continue to accumulate diversity if prey capture

continues to occur. This may explain the increased variation in diversity among year-old leaves.

Because pitcher plant leaves are similar in habitat structure and resource composition at a particular point in time, it is not surprising that bacterial communities converged in composition over the first growing season. This convergence can be attributed to common selection pressures acting on a shared pool of immigrants, which would serve to homogenize communities (see Vellend, 2016). This convergence is supported by the converging carbon substrate and OTU profiles of pitcher communities from two different populations. Successional convergence has also been documented in non-bacterial communities from the pitcher plant *Sarracenia purpurea* (Miller and terHorst, 2012), other phyllosphere bacterial communities (Copeland *et al.*, 2015), the human gut (Palmer *et al.*, 2007), and more generally, across a variety of terrestrial (e.g., Christensen and Peet, 1984) and aquatic ecosystems (e.g., Moorhead *et al.*, 1998).

Contrasting with this pattern, year-old leaves contained higher microbial beta diversities than those observed in preceding time points, implying communities diverged over the winter. This is likely the consequence of stochastic prey capture amplifying differences in leaves' ratios of labile to recalcitrant metabolic substrates. If this ratio constitutes a reasonably strong selection gradient, then this heterogeneity should drive divergence among communities (Eisenhauer *et al.*, 2013; Dini-Andreote *et al.*, 2015). Alternatively, stochastic drift can drive community divergence when the number of individuals is small (Orrock and Watling, 2010; Vellend, 2016). In *Darlingtonia* leaves, however, drift is likely minimal, since bacterial population sizes are probably too large to be influenced by demographic stochasticity.

Temporal variation in propagule supply can also lead to community divergence (Evans *et al.*, 2017). This might occur when a fraction of ageing leaves, whose communities

had previously been homogenized by a sustained input from a common microbial pool, suddenly experience a more stochastic supply of immigrants. If the species comprising the common immigrant pool also vary over time, then discontinuous, stochastic prey input could drive divergence in communities in the absence of drift and selection effects. A 55-year study of old-field communities observed similar patterns of convergence giving way to divergence driven by dispersal limitation (Meiners *et al.*, 2015). Nonlinear temporal trends in beta diversity have also been identified in host-associated and groundwater microbial communities (e.g., Marino *et al.*, 2014; Zhou *et al.*, 2014), though the processes governing these patterns remain vague. Pitcher microbial communities offer a tractable system in which to experimentally assess the relative influences of deterministic vs. stochastic dispersal on beta diversity.

### **Temporal trends in communities' functional attributes**

Leaf communities' carbon metabolic profiles had temporal patterns similar to OTU beta diversity, implicating a link between community composition and metabolic functioning. However, microbial community sequences were not generated from the leaves used for Biolog assays, prohibiting a direct test of this hypothesis. Many of the genes predicted to be enriched in young pitchers (ribosomal RNA copy number, chemotaxis/motility genes) have been linked to a taxon's responsiveness to unpredictable nutrient conditions (Klappenbach *et al.*, 2000; Livermore *et al.*, 2014; Nemergut *et al.*, 2015). These predictions are in accordance with successional tolerance and inhibition models, wherein ruderal, fast-responders are eventually joined or outcompeted by more growth-efficient forms (Connell and Slatyer, 1977; Huston and Smith, 1987; Tilman, 1990).

Metabolic pathways contributing to amino acid demamination and N mineralization were predicted to be enriched during mid-succession — a pattern also detected during

microbial succession on decomposing corpses (Metcalf *et al.*, 2016). Similar successional increases in metabolic genes have been documented in host-associated (Koenig *et al.*, 2011) and aquatic (Teeling *et al.*, 2012) bacterial communities. In concert with the community metabolic assays, these findings demonstrate, in principle, how bacterial communities' taxonomic and functional profiles can undergo predictable changes over a host's lifespan in accordance with predictions derived from succession models. The next step is to relate these community changes to the services they provide the host organism.

### **Linking community properties to host functioning**

In agreement with succession hypotheses (Figure 1d), detrital processing rates by the pitcher leaf communities varied over time, and were positively associated with detritivore abundances (bacteria, midge larvae) and bacterial diversity. Loreau (2001) reasoned that microbial diversity would enhance decomposition only if the number of organic compounds able to be metabolized by the community increased with alpha diversity. This prediction is supported by observations of peak bacterial diversity coinciding with peak carbon metabolic diversity during mid-succession (ca. 55 days). To date, the few studies to investigate microbial diversity and decomposition rates *in situ* have arrived at conflicting results (Hättenschwiler *et al.*, 2011) but a positive relationship is common in the few experimental tests using bacteria (Nielsen *et al.*, 2011), including in a lab experiment using bacterial isolates from the same *Darlingtonia* population studied here (Armitage, 2016). More generally, microbial community composition is anticipated to set ecosystem process rates (Figure 1e). — especially when the effects of environmental variation are minimal (Graham *et al.*, 2016).

From a host plant's perspective, decomposition by its commensal biota should set limits on its rate of N sequestration. In *Darlingtonia*, the state of fly digestion explained a



some of the variance in N uptake efficiency, though there was still a large amount of unexplained variance to account for. More convincingly, a follow-up experiment failed to detect the same mid-succession peak in N uptake efficiencies among pitcher leaves containing experimentally homogenized bacterial communities. The related pitcher plant *Sarracenia purpurea* also relies heavily on its bacterial community for nitrogen processing (Butler *et al.*, 2008). Furthermore, microbial community composition is an important determinant of nitrogen mineralization rates in soil (Balser and Firestone, 2005; Strickland *et al.*, 2009), and changes in N mineralization can track microbial community change over time, independent of environmental variation (Balser and Firestone, 2005). In concert, these results highlight the potential for the pitcher microbial communities to mediate N transfer from prey to host — a function critical to the fitness of a host plant adapted to life in nitrogen-poor soils.

Contrary to predictions from succession models (Vitousek and Reiners, 1975; Finn, 1982; Loreau, 1998), maximal rates of N loss from the *Darlingtonia* food web occurred during periods of high (rather than low) standing biomass. This mismatch may be explained by differences between donor-controlled food webs, which receive pulses of bioavailable N at regular intervals, and primary producer-controlled food webs, in which the N pool is slowly renewed *in situ* and quickly immobilized (Fierer *et al.*, 2010). As a consequence, donor-controlled food webs may not experience strong competitive pressure to sequester growth-limiting nutrients. This may be particularly true in *Darlingtonia* and other digestive communities for two reasons. First, rapid bacterial turnover (e.g., via viral lysis & protozoan grazing) serves to increase the concentration of bioavailable N. Second, pitcher leaves' continuous accumulation of low C:N detritus (relative to plant-based food webs) may buffer the food web from a loss of nitrogen to the host plant.

## Succession or seasonality?

Because study leaves belonged to the same cohort, their temporal dynamics may reflect the effects of seasonal forcing rather than succession. Although winter temperatures drive the plants into a state of dormancy, their leaves persist, and I have observed active populations of mites, midges, and bacteria in pitcher leaves underneath snow cover, suggesting that the food web still functions during the winter months. Furthermore, these brief cold periods are unlikely to have caused strong population bottlenecks or extinctions, given the large bacterial biomasses observed across pitcher leaves. Seasonal forcing should cause community composition to be cyclical over an annual cycle, yet communities collected from 11 and 365-day samples on the same day were strongly dissimilar, implying that under nearly identical external environmental conditions, communities show measurable age-related differences — an observation in line with previous studies (Thompson *et al.*, 1993; Redford and Fierer, 2009; Williams *et al.*, 2013; Metcalf *et al.*, 2016).

## Cross-system considerations

It is now recognized that community and ecosystem dynamics are shaped by unique combinations of disturbances, competition, and dispersal (Meiners *et al.*, 2015). And although succession is most frequently defined in terms of species turnover, it is reasonable to redefine it as the change in average trait values or gene frequencies within a community. Such change could influence the functioning of the host plant if, for instance, selection favored a more efficient processing or storage of nitrogen by commensal organisms. The potential for rapid evolutionary change to influence ecosystem properties has been documented (Harmon *et al.*, 2009), yet theory integrating ecosystem development and evolution is scarce (Loreau, 1998). In doing so, care must be taken to avoid ascribing adaptive properties to ecosystems (i.e., treating ecosystems as ‘super-organisms’) (Odum,

1969). However, because many host-associated systems serve functions critical to their hosts' fitnesses, they may be expected to more closely align with Odum's controversial predictions for increasing stability and productivity. Tests of these predictions (e.g., Beaver, 1985; Neutel *et al.*, 2007) using existing quantitative frameworks (Finn, 1982; DeAngelis, 1992; Loreau, 1998) would be difficult but valuable contributions toward a unified theory of communities and ecosystems.

## Conclusions

By combining a  $^{15}\text{N}$  stable isotope pulse-chase experiment with observations of community dynamics, I have confirmed a number of successional hypotheses in natural, host-associated microbial digestive communities. In particular, my data support and extend the hypotheses of parallel community trajectories and mid-successional peaks in functional and taxonomic diversity to host-associated bacterial communities. In concert, these results represent a step towards integrating host-associated microbial communities into classical conceptual models of ecosystem development and demonstrate a coupling of community dynamics and host functioning. Looking ahead, more theoretical and experimental work is needed before we can identify definitive links between community dynamics and host functioning, and I believe that the continued experimental use of replicated, natural host-associated communities offers a productive path forward.

## ACKNOWLEDGEMENTS

I thank Anna Petrosky, Ramon Leon, & Stefani Brandt for assistance with data collection. Ellen Simms, Todd Dawson, and the UC Berkeley Forestry Camp provided facilities and equipment. I thank Stuart Jones, Mary Firestone, Mary Power & Wayne Sousa for critical feedback. Field collection permits were provided by Jim Belsher-Howe (USFS).

## 476 REFERENCES

- 477 Agresti A. (2013). *Categorical Data Analysis*. 3rd ed. John Wiley & Sons, Inc.: Hoboken, NJ.
- 478 Alday JG, Marrs RH, Martínez-Ruiz C. (2011). Vegetation convergence during early  
479 succession on coal wastes: a 6-year permanent plot study. *J Veg Sci* **22**: 1072–1083.
- 480 Anderson MJ. (2001). A new method for non-parametric multivariate analysis of variance.  
481 *Austral Ecol* **26**: 32–46.
- 482 Armitage DW. (2016). Time-variant species pools shape competitive dynamics and  
483 biodiversity–ecosystem function relationships. *Proc R Soc B* **283**: 20161437.
- 484 Auclair AN, Goff FG. (1971). Diversity relations of upland forests in the Western Great  
485 Lakes area. *Am Nat* **105**: 499–528.
- 486 Bäckhed F, Ley RE, Sonnenburg JL, Peterson DA, Gordon JI. (2005). Host-bacterial  
487 mutualism in the human intestine. *Science* **307**: 1915–1920.
- 488 Balser TC, Firestone MK. (2005). Linking microbial community composition and soil  
489 processes in a California annual grassland and mixed-conifer forest. *Biogeochemistry* **73**:  
490 395–415.
- 491 Beaver RA. (1985). Geographical variation in food web structure in *Nepenthes* pitcher  
492 plants. *Ecol Entomol* **10**: 241–248.
- 493 Bell T, Newman JA, Silverman BW, Turner SL, Lilley AK. (2005). The contribution of  
494 species richness and composition to bacterial services. *Nature* **436**: 1157–1160.
- 495 Burnham KP, Anderson DR. (2003). *Model Selection and Multimodel Inference: A Practical*  
496 *Information-Theoretic Approach*. Springer Science & Business Media. Berlin.
- 497 Butler JL, Gotelli NJ, Ellison AM. (2008). Linking the brown and green: nutrient  
498 transformation and fate in the *Sarracenia* microecosystem. *Ecology* **89**: 898–904.
- 499 Caporaso JG, Kuczynski J, Stombaugh J, Bittinger K, Bushman FD, Costello EK, *et al.*  
500 (2010). QIIME allows analysis of high-throughput community sequencing data. *Nat Methods*  
501 **7**: 335–336.
- 502 Cardinale BJ, Wright JP, Cadotte MW, Carroll IT, Hector A, Srivastava DS, *et al.* (2007).  
503 Impacts of plant diversity on biomass production increase through time because of species  
504 complementarity. *Proc Natl Acad Sci* **104**: 18123–18128.
- 505 Christensen NL, Peet RK. (1984). Convergence during secondary forest succession. *J Ecol*  
506 **72**: 25–36.
- 507 Connell JH, Slatyer RO. (1977). Mechanisms of succession in natural communities and their  
508 role in community stability and organization. *Am Nat* **111**: 1119–1144.
- 509 Copeland JK, Yuan L, Layeghifard M, Wang PW, Guttman DS. (2015). Seasonal community  
510 succession of the phyllosphere microbiome. *Mol Plant Microbe Interact* **28**: 274–285.

511 DeAngelis DL. (1992). Dynamics of Nutrient Cycling and Food Webs. Chapman & Hall:  
512 London□; New York.

513 Dini-Andreote F, Stegen JC, Elsas JD van, Salles JF. (2015). Disentangling mechanisms that  
514 mediate the balance between stochastic and deterministic processes in microbial succession.  
515 *Proc Natl Acad Sci* **112**: E1326–E1332.

516 Eisenhauer N, Schulz W, Scheu S, Jousset A. (2013). Niche dimensionality links biodiversity  
517 and invasibility of microbial communities. *Funct Ecol* **27**: 282–288.

518 Evans S, Martiny JBH, Allison SD. (2017). Effects of dispersal and selection on stochastic  
519 assembly in microbial communities. *ISME J* **11**: 176–185.

520 Fierer N, Nemergut D, Knight R, Craine JM. (2010). Changes through time: integrating  
521 microorganisms into the study of succession. *Res Microbiol* **161**: 635–642.

522 Finn JT. (1982). Ecosystem succession, nutrient cycling and output-input ratios. *J Theor Biol*  
523 **99**: 479–489.

524 Fisher SG, Gray LJ, Grimm NB, Busch DE. (1982). Temporal succession in a desert stream  
525 ecosystem following flash flooding. *Ecol Monogr* **52**: 93–110.

526 Graham EB, Knelman JE, Schindlbacher A, Siciliano S, Breulmann M, Yannarell A, *et al.*  
527 (2016). Microbes as engines of ecosystem function: When does community structure enhance  
528 predictions of ecosystem processes? *Front Microbiol* **7**.

529 Harmon LJ, Matthews B, Des Roches S, Chase JM, Shurin JB, Schluter D. (2009).  
530 Evolutionary diversification in stickleback affects ecosystem functioning. *Nature* **458**: 1167–  
531 1170.

532 Hättenschwiler S, Fromin N, Barantal S. (2011). Functional diversity of terrestrial microbial  
533 decomposers and their substrates. *C R Biol* **334**: 393–402.

534 Hooper DU, Chapin FS, Ewel JJ, Hector A, Inchausti P, Lavorel S, *et al.* (2005). Effects of  
535 biodiversity on ecosystem functioning: a consensus of current knowledge. *Ecol Monogr* **75**:  
536 3–35.

537 Huston M, Smith T. (1987). Plant succession: life history and competition. *Am Nat* **130**: 168–  
538 198.

539 Jemielita M, Taormina MJ, Burns AR, Hampton JS, Rolig AS, Guillemin K, *et al.* (2014).  
540 Spatial and temporal features of the growth of a bacterial species colonizing the zebrafish  
541 gut. *mBio* **5**: e01751-14.

542 Kanehisa M, Sato Y, Kawashima M, Furumichi M, Tanabe M. (2016). KEGG as a reference  
543 resource for gene and protein annotation. *Nucleic Acids Res* **44**: D457–D462.

544 Klappenbach JA, Dunbar JM, Schmidt TM. (2000). rRNA operon copy number reflects  
545 ecological strategies of bacteria. *Appl Environ Microbiol* **66**: 1328–1333.

546 Koenig JE, Spor A, Scalfone N, Fricker AD, Stombaugh J, Knight R, *et al.* (2011).  
547 Succession of microbial consortia in the developing infant gut microbiome. *Proc Natl Acad*  
548 *Sci* **108**: 4578–4585.

549 Langille MGI, Zaneveld J, Caporaso JG, McDonald D, Knights D, Reyes JA, *et al.* (2013).  
550 Predictive functional profiling of microbial communities using 16S rRNA marker gene  
551 sequences. *Nat Biotechnol* **31**: 814–821.

552 Livermore JA, Emrich SJ, Tan J, Jones SE. (2014). Freshwater bacterial lifestyles inferred  
553 from comparative genomics. *Environ Microbiol* **16**: 746–758.

554 Loreau M. (1998). Ecosystem development explained by competition within and between  
555 material cycles. *Proc R Soc B Biol Sci* **265**: 33–38.

556 Loreau M. (2001). Microbial diversity, producer–decomposer interactions and ecosystem  
557 processes: a theoretical model. *Proc R Soc Lond B Biol Sci* **268**: 303–309.

558 Loucks OL. (1970). Evolution of diversity, efficiency, and community stability. *Am Zool* **10**:  
559 17–25.

560 Love MI, Huber W, Anders S. (2014). Moderated estimation of fold change and dispersion  
561 for RNA-seq data with DESeq2. *Genome Biol* **15**: 1–21.

562 Lugtenberg B, Kamilova F. (2009). Plant-growth-promoting rhizobacteria. *Annu Rev*  
563 *Microbiol* **63**: 541–556.

564 Marino S, Baxter NT, Huffnagle GB, Petrosino JF, Schloss PD. (2014). Mathematical  
565 modeling of primary succession of murine intestinal microbiota. *Proc Natl Acad Sci* **111**:  
566 439–444.

567 McMurdie PJ, Holmes S. (2013). phyloseq: an R package for reproducible interactive  
568 analysis and graphics of microbiome census data. *PLOS ONE* **8**: e61217.

569 Meiners SJ, Pickett STA, Cadenasso ML. (2015). *An Integrative Approach to Successional*  
570 *Dynamics: Tempo and Mode of Vegetation Change*. Cambridge University Press:  
571 Cambridge, UK.

572 Metcalf JL, Xu ZZ, Weiss S, Lax S, Treuren WV, Hyde ER, *et al.* (2016). Microbial  
573 community assembly and metabolic function during mammalian corpse decomposition.  
574 *Science* **351**: 158–162.

575 Miller TE, terHorst CP. (2012). Testing successional hypotheses of stability, heterogeneity,  
576 and diversity in pitcher-plant inquiline communities. *Oecologia* **170**: 243–251.

577 Moorhead DL, Hall DL, Willig MR. (1998). Succession of macroinvertebrates in playas of  
578 the Southern High Plains, USA. *J North Am Benthol Soc* **17**: 430–442.

579 Nemergut DR, Knelman JE, Ferrenberg S, Bilinski T, Melbourne B, Jiang L, *et al.* (2015).  
580 Decreases in average bacterial community rRNA operon copy number during succession.  
581 *ISME J*. e-pub ahead of print, doi: 10.1038/ismej.2015.191.



- 582 Neutel A-M, Heesterbeek JAP, van de Koppel J, Hoenderboom G, Vos A, Kaldewey C, *et al.*  
583 (2007). Reconciling complexity with stability in naturally assembling food webs. *Nature*  
584 **449**: 599–602.
- 585 Nielsen UN, Ayres E, Wall DH, Bardgett RD. (2011). Soil biodiversity and carbon cycling: a  
586 review and synthesis of studies examining diversity–function relationships. *Eur J Soil Sci* **62**:  
587 105–116.
- 588 Odum EP. (1969). The strategy of ecosystem development. *Science* **164**: 262–270.
- 589 Oksanen J, Blanchet FG, Kindt R, Legendre P, Minchin PR, O’Hara RB, *et al.* (2015).  
590 vegan: Community Ecology Package.
- 591 Orrock JL, Watling JL. (2010). Local community size mediates ecological drift and  
592 competition in metacommunities. *Proc R Soc Lond B Biol Sci* **277**: 2185–2191.
- 593 Palmer C, Bik EM, DiGiulio DB, Relman DA, Brown PO. (2007). Development of the  
594 human infant intestinal microbiota. *PLOS Biol* **5**: e177.
- 595 Peet RK, Christensen NL. (1988). Changes in species diversity during secondary forest  
596 succession on the North Carolina Piedmont. In: During HJ, Werger MJA, Williams JH (eds).  
597 *Diversity and Pattern in Plant Communities*. SPB Academic Publishing: The Hague, The  
598 Netherlands, pp 233–245.
- 599 R Development Core Team. (2015). R: A language and environment for statistical  
600 computing. R Foundation for Statistical Computing: Vienna, Austria.
- 601 Redford AJ, Fierer N. (2009). Bacterial succession on the leaf surface: A novel system for  
602 studying successional dynamics. *Microb Ecol* **58**: 189–198.
- 603 van Ruijven J, Berendse F. (2005). Diversity-productivity relationships: initial effects, long-  
604 term patterns, and underlying mechanisms. *Proc Natl Acad Sci U S A* **102**: 695–700.
- 605 Schmidt SK, Costello EK, Nemergut DR, Cleveland CC, Reed SC, Weintraub MN, *et al.*  
606 (2007). Biogeochemical consequences of rapid microbial turnover and seasonal succession in  
607 soil. *Ecology* **88**: 1379–1385.
- 608 Strickland MS, Lauber C, Fierer N, Bradford MA. (2009). Testing the functional significance  
609 of microbial community composition. *Ecology* **90**: 441–451.
- 610 Teeling H, Fuchs BM, Becher D, Klockow C, Gardebrecht A, Bennke CM, *et al.* (2012).  
611 Substrate-controlled succession of marine bacterioplankton populations induced by a  
612 phytoplankton bloom. *Science* **336**: 608–611.
- 613 Thompson IP, Bailey MJ, Fenlon JS, Fermor TR, Lilley AK, Lynch JM, *et al.* (1993).  
614 Quantitative and qualitative seasonal changes in the microbial community from the  
615 phyllosphere of sugar beet (*Beta vulgaris*). *Plant Soil* **150**: 177–191.
- 616 Tilman D. (1990). Constraints and tradeoffs: toward a predictive theory of competition and  
617 succession. *Oikos* **58**: 3–15.

- 618 Vellend M. (2016). The Theory of Ecological Communities. Princeton University Press:  
619 Princeton, NJ.
- 620 Vitousek PM, Reiners WA. (1975). Ecosystem succession and nutrient retention: a  
621 hypothesis. *Bioscience* **25**: 376–381.
- 622 Weis JJ, Cardinale BJ, Forshay KJ, Ives AR. (2007). Effects of species diversity on  
623 community biomass production change over the course of succession. *Ecology* **88**: 929–939.
- 624 Williams MA, Jangid K, Shanmugam SG, Whitman WB. (2013). Bacterial communities in  
625 soil mimic patterns of vegetative succession and ecosystem climax but are resilient to change  
626 between seasons. *Soil Biol Biochem* **57**: 749–757.
- 627 Wolfe LM. (1981). Feeding behavior of a plant: differential prey capture in old and new  
628 leaves of the pitcher plant (*Sarracenia purpurea*). *Am Midl Nat* **106**: 352–359.
- 629 Zhou J, Deng Y, Zhang P, Xue K, Liang Y, Nostrand JDV, *et al.* (2014). Stochasticity,  
630 succession, and environmental perturbations in a fluidic ecosystem. *Proc Natl Acad Sci* **111**:  
631 E836–E845.

632  
633 **FIGURE LEGENDS**

634

635 **Figure 1.** Predictions for successional patterns in *Darlingtonia* leaves. **(a)** Conceptual model  
636 for the interactions between host leaf (shaded oval) and its digestive food web (boxes).  
637 Dashed grey arrows denote ecological processes hypothesized to influence food web  
638 dynamics and host functioning. **(b)**  $\alpha$ -diversity and living biomass are predicted to increase in  
639 pitcher leaves after opening, and eventually either saturate or decrease, consistent with  
640 observations made across a variety of ecosystems (Odum, 1969; Loucks, 1970; Auclair and  
641 Goff, 1971; Vitousek and Reiners, 1975; Connell and Slatyer, 1977; Peet and Christensen,  
642 1988; Alday *et al.*, 2011). **(c)** Compositional differences among leaf communities ( $\beta$ -  
643 diversity) may either decrease or increase depending on whether selection is homogenous or  
644 variable among leaves (Christensen and Peet, 1984; Dini-Andreote *et al.*, 2015; Meiners *et*  
645 *al.*, 2015). **(d)** Ecosystem or host function is anticipated to be unimodal or saturating over a  
646 successional gradient (van Ruijven and Berendse, 2005; Cardinale *et al.*, 2007; Weis *et al.*,  
647 2007; Armitage, 2016), — a pattern predicted to be influenced by **(e)** the positive effects of



648  $\alpha$ -diversity and living biomass on ecosystem function (Hooper *et al.*, 2005; Bell *et al.*, 2005).

649 Dashed lines denote alternative hypotheses.

650

651 **Figure 2.** Trends in community composition during succession. **(a)** Insect prey biomass

652 rapidly increased in leaves after opening and remained relatively steady throughout the

653 remainder of the leaf's lifespan, while bacterial and midge larval abundances steadily

654 increased throughout leaves' first growing season, and then sharply declined after the first

655 year. **(b)** Bacterial alpha diversities increased and then leveled off in middle-aged pitcher

656 communities, dropping slightly during year 2. **(c)** Conversely, leaf bacterial beta diversities

657 decreased during the first growing season and increased at the beginning of year 2. In each

658 graph, shared letters above groups indicate no significant pairwise differences ( $p > 0.05$ ).

659 Points denote mean values  $\pm$  SEM.

660

661 **Figure 3.** Principal coordinate (PCoA) plots for **(a)** Jensen-Shannon distances between

662 samples, demonstrating convergence and approximately-parallel successional trajectories in

663 between-population community structures over time, and **(b)** Jaccard distances between

664 Biolog<sup>TM</sup> plates for communities of different ages, demonstrating the convergence of

665 metabolic profiles in mid-successional pitcher leaves and overlapping metabolic profiles for

666 young and senescing leaves. The percentages of variance explained by the principal

667 coordinates are displayed on each axis. Points denote yearly centroid values  $\pm$  SEM.

668

669 **Figure 4.** Abundance-weighted heat map of 97% OTUs that experienced significant ( $p <$

670 0.01) 8-fold or greater turnover between time points for the **(a)** 2013 Blackhawk Creek and

671 **(b)** 2014 Butterfly Valley study populations. Tick marks on X-axis denote individual pitcher

672 samples. OTUs are labeled by family and ordered based on the community age in which they

were first detected regardless of year. Random forest models trained on OTU abundances from 2013 were able to predict the ages of 2014 samples with 75% accuracy (Figure S7).

**Figure 5. (a)** Mid-successional pitcher communities were capable of metabolizing significantly more Biolog GN2 plate C-substrates than were early- and late-stage communities. **(b)** Mid-successional pitcher communities were much more similar to one another in terms of their carbon metabolic profiles than were early- and late-stage pitchers.

**Figure 6.** Trends in ecosystem properties during succession. **(a)** The frequencies of decomposition classes for pitchers of different ages. Square size is proportional to relative frequency of a particular decomposition category for that age class.  $\chi^2$  is the likelihood ratio test statistic for the effect of pitcher age on the fit of a multinomial logit distribution to predict decomposition categories. **(b & c)** The probabilities of observing high decomposition rates increases with both bacterial diversity and bacterial biomass. Curves represent fitted probabilities of multinomial logit models, and individual curves can be interpreted as logistic regression fits for each decomposition category. **(d)** Pitcher leaves' nitrogen uptake efficiencies change over time, and are significantly lower in late-stage pitcher leaves. Points denote mean values  $\pm$  SEM. **(e)** The extent of prey decomposition is positively associated with the percentage of prey-derived nitrogen found in the host leaf's foliar tissue. The dashed line denotes the best-fit linear model  $\pm$  95% CI.

**Figure 7.** Homogenizing the food webs of 11, 55, and 365 day pitchers and placing them back into the plants removes the significant differences observed in natural pitcher communities of the same ages. Letters above the groups represent the within-treatment contrasts. Points denote mean values  $\pm$  SEM (n = 5).

**Table 1.** Model selection results of multinomial logit and linear regression models for decomposition category and nitrogen uptake efficiency, respectively. Bolded values indicate the best-performing models based on  $AIC_c$  and  $R^2$  statistics.  $AIC_c$  values falling within 9 units of the top model were considered equally parsimonious.

| Decomposition Category           |                |              | Nitrogen Uptake Efficiency       |                |             |
|----------------------------------|----------------|--------------|----------------------------------|----------------|-------------|
| Predictor Variables              | $\Delta AIC_c$ | $pseudo-R^2$ | Predictor Variables              | $\Delta AIC_c$ | $R^2$       |
| ~ Community age <sup>1</sup> (A) | 32             | 0.71         | ~ Community age <sup>1</sup> (A) | 418            | 0.17        |
| ~ Bacterial abundance (B)        | 23             | 0.37         | ~ Bacterial abundance (B)        | 420            | 0.04        |
| ~ Bacterial diversity (D)        | 26             | 0.34         | ~ Bacterial diversity (D)        | 430            | 0.05        |
| ~ Bacterivore richness (R)       | 61             | 0.05         | ~ Log midge abundance (M)        | 436            | 0.00        |
| ~ Log midge abundance (M)        | 45             | 0.20         | ~ Log mite abundance (N)         | 436            | 0.01        |
| ~ Log mite abundance (N)         | 60             | 0.05         | ~ Leaf dry mass (P)              | 410            | 0.23        |
| ~ B + D                          | <b>0</b>       | 0.56         | ~ Decomposition category (C)     | 14             | 0.16        |
| ~ B + D + M                      | <b>3</b>       | 0.59         | ~ A + C + P                      | <b>4</b>       | <b>0.37</b> |
| ~ A + B + D + M                  | 24             | <b>0.82</b>  | ~ A + B + D + P + C              | <b>0</b>       | 0.34        |
| ~ 1 (intercept-only null)        | 55             | 0.00         | ~ 1 (intercept-only null)        | 434            | 0.00        |

<sup>1</sup> Age covariate was modeled as quadratic

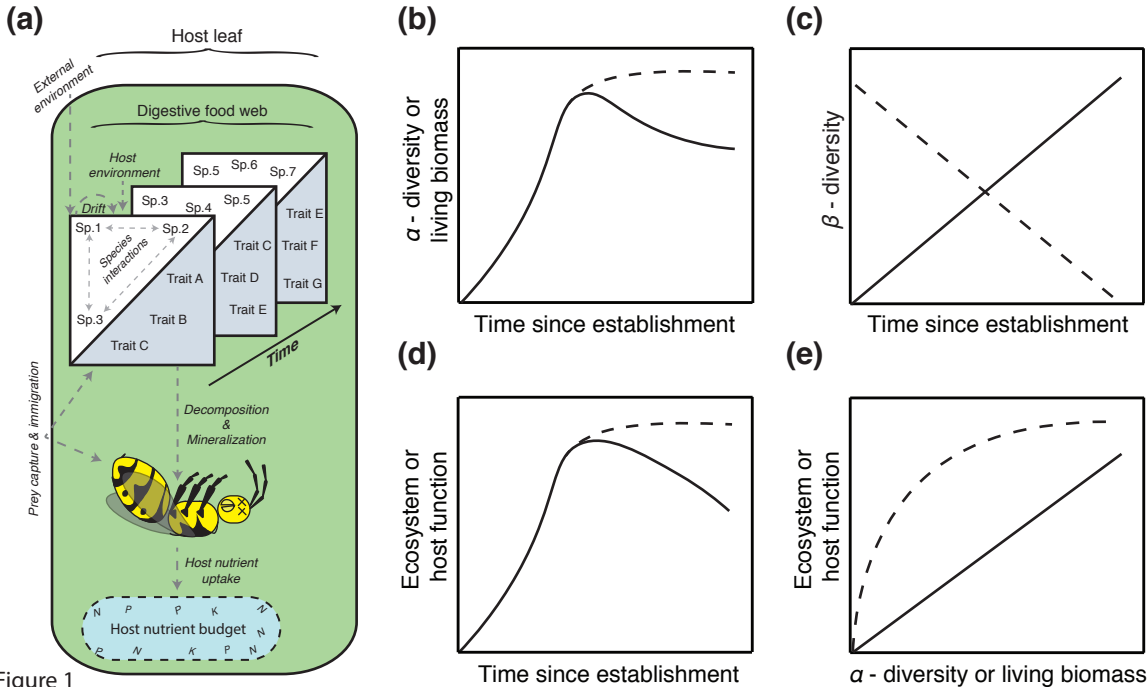

Figure 1

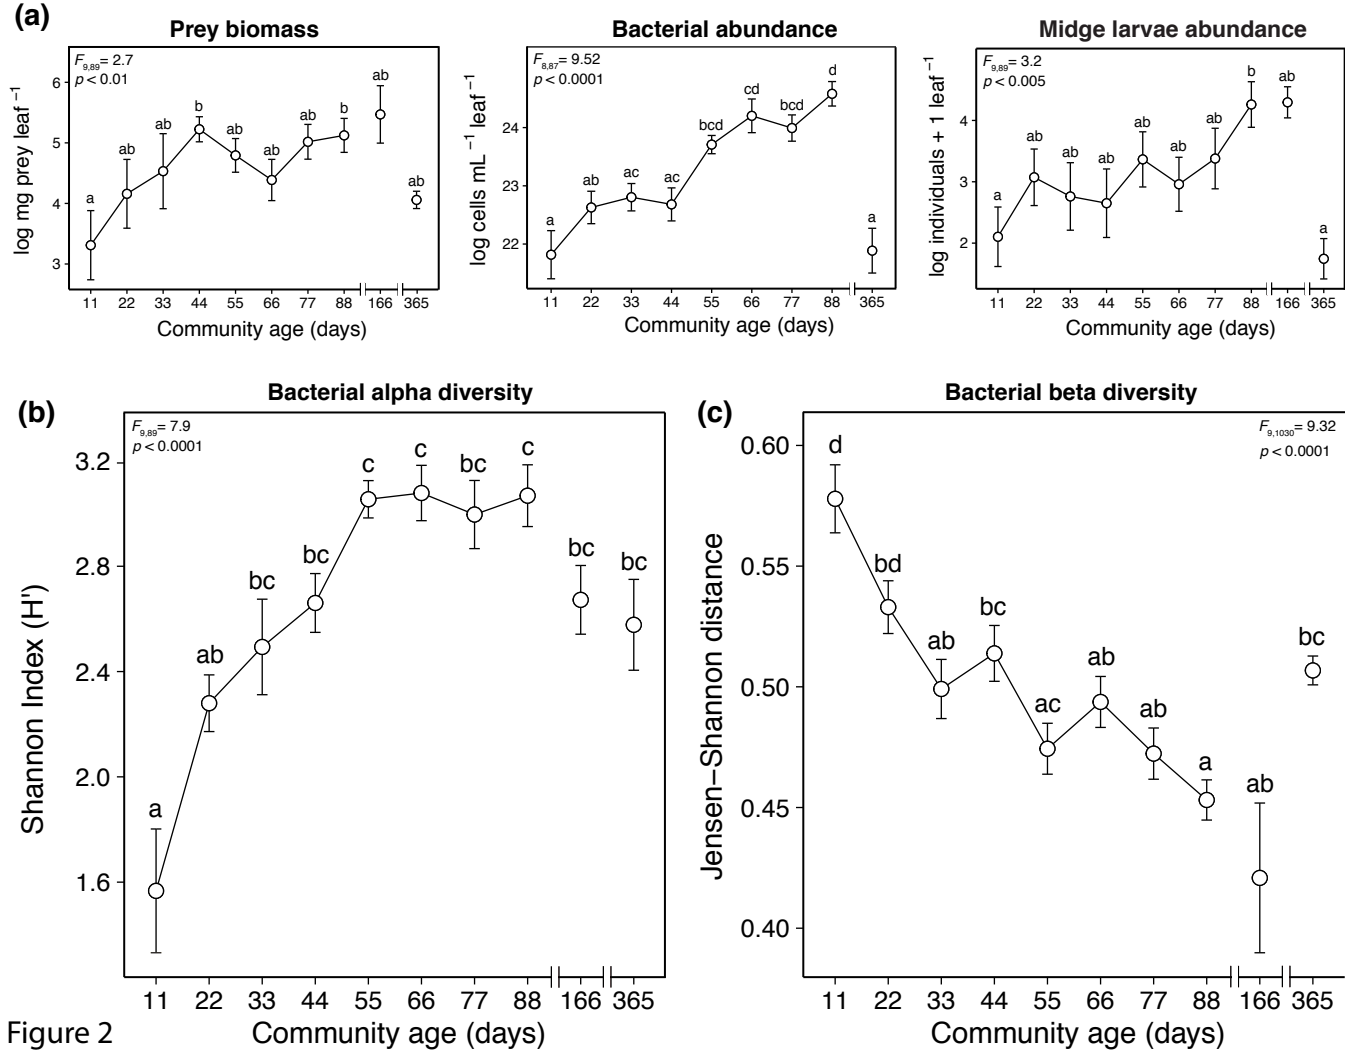

**(a)****Bacterial community composition**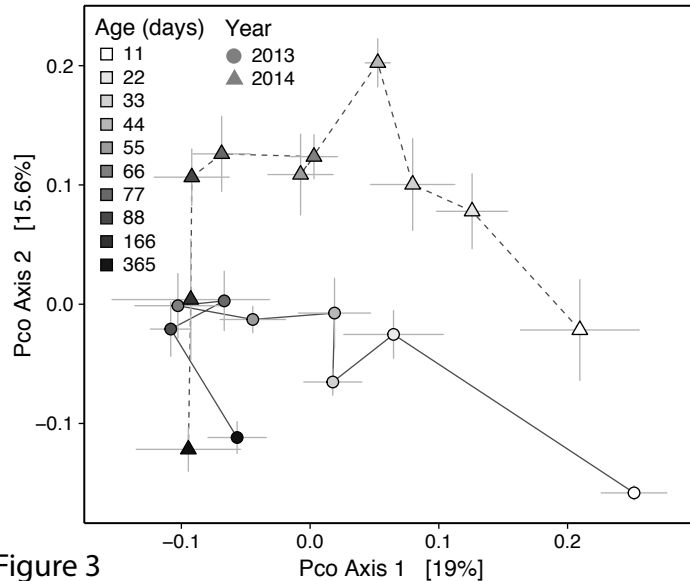**(b)****Community carbon metabolic profile**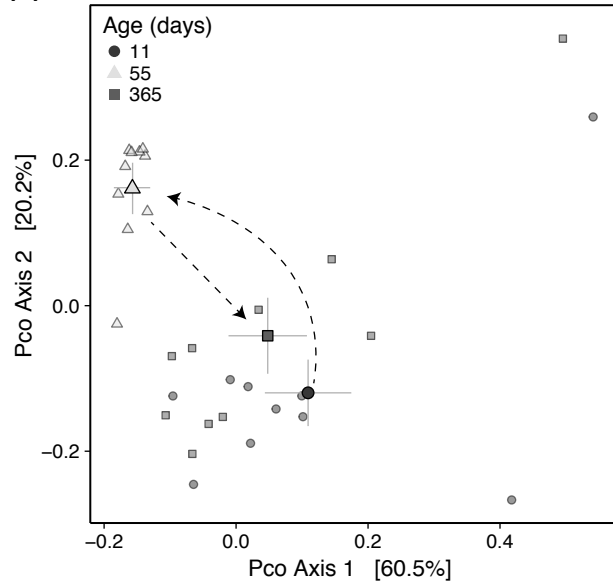**Figure 3**

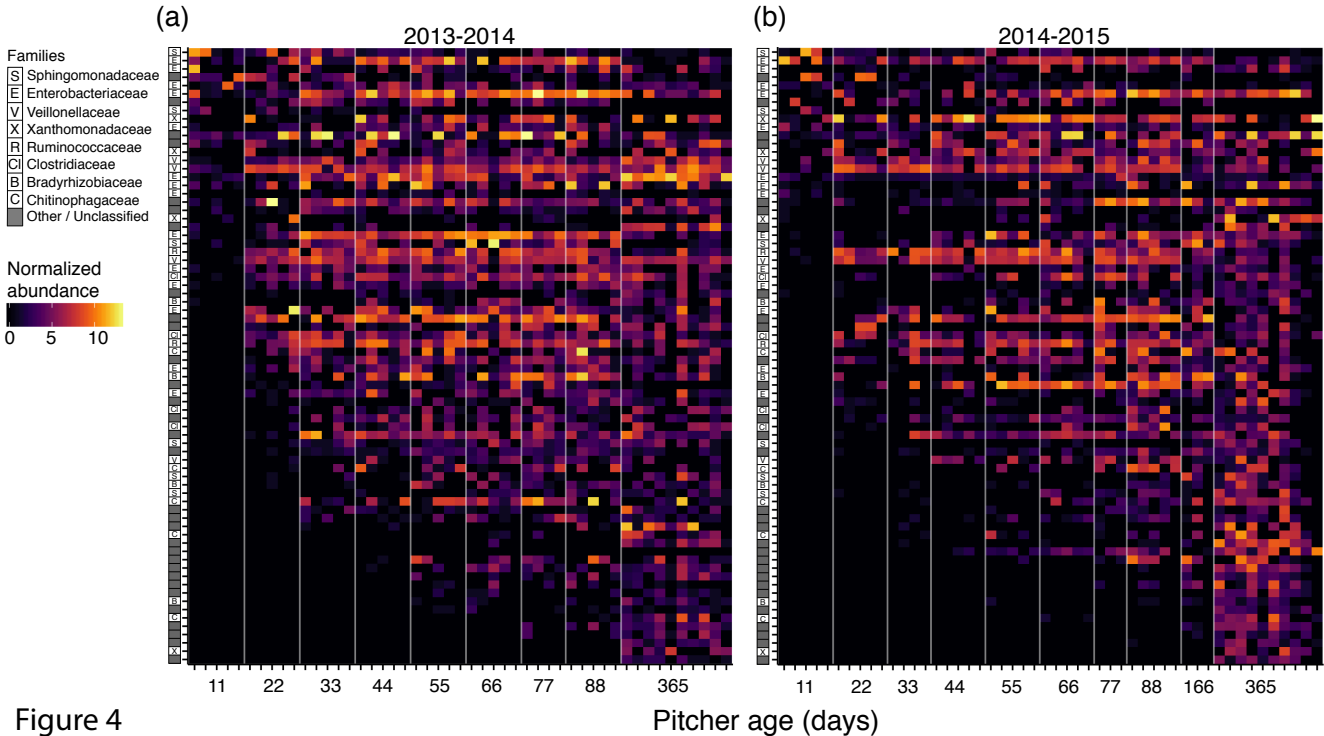

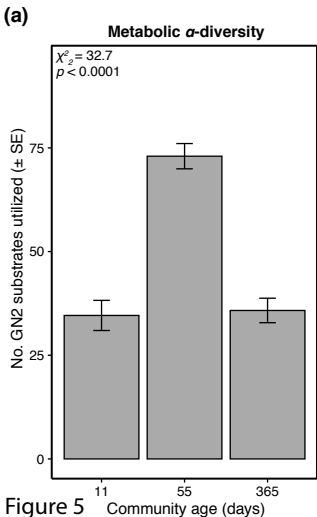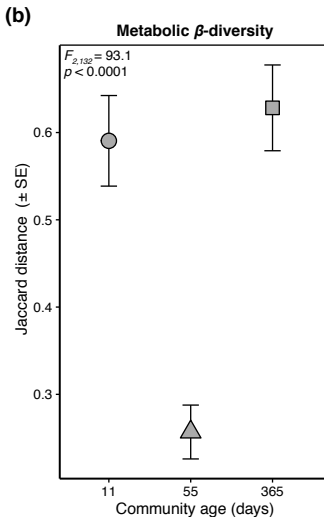

**Figure 5** Community age (days)



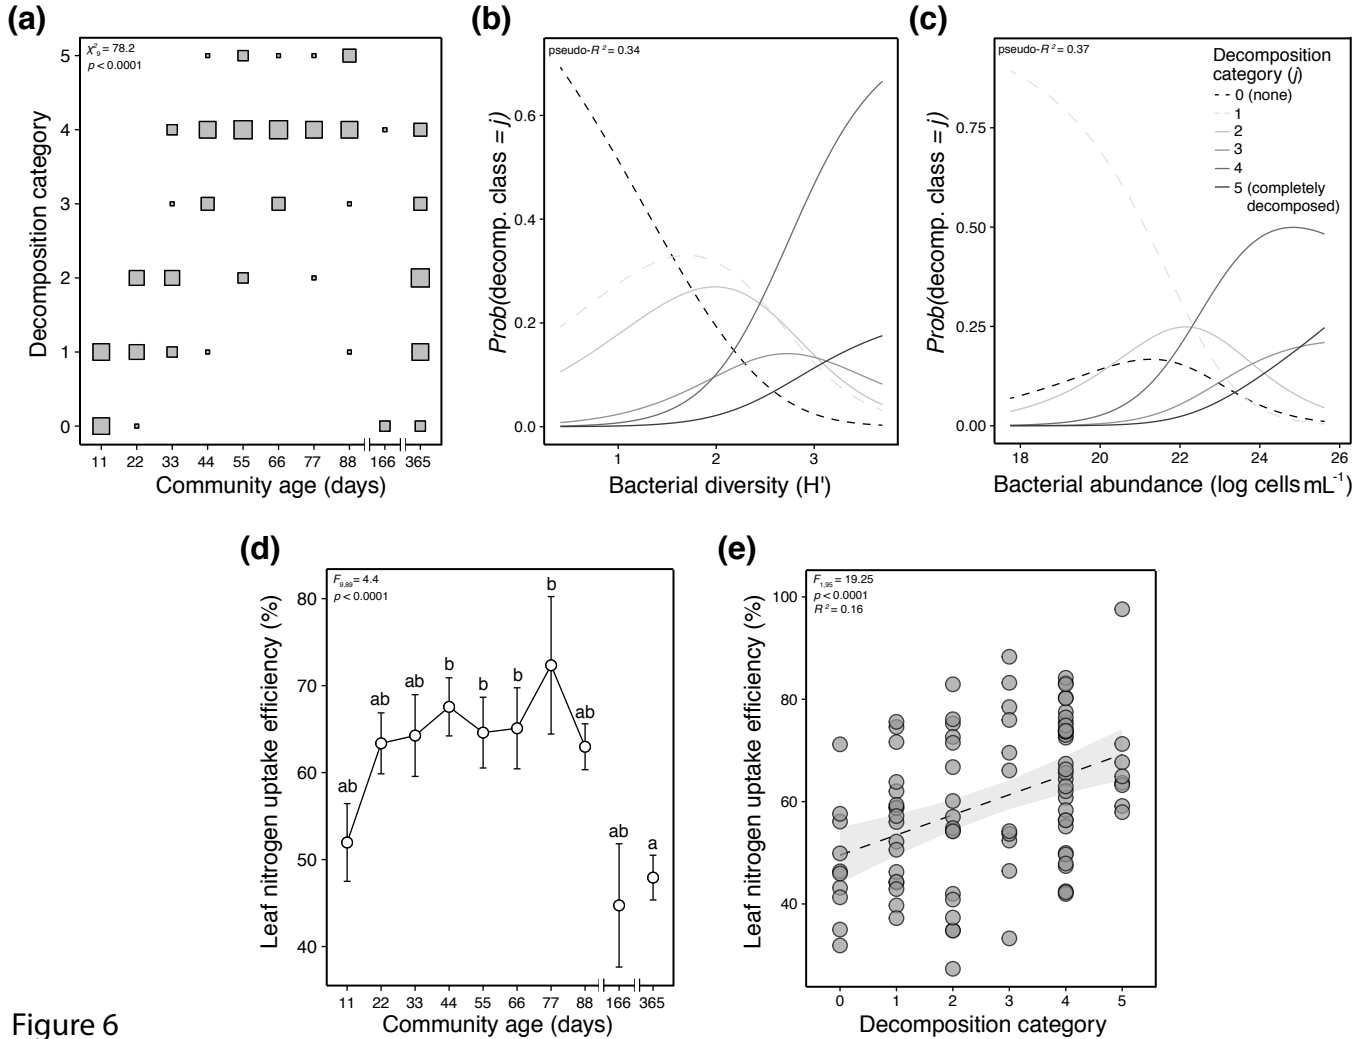

Figure 6

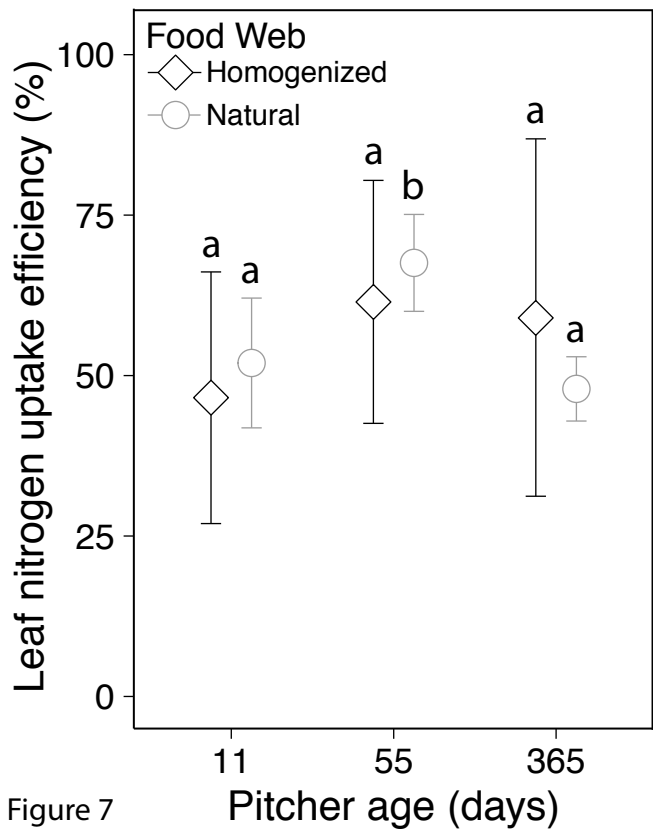

Figure 7
